# Supplementary material
Source: HighWire-hosted journal article supplement (https://www.cmaj.ca/highwire/filestream/150371/field_highwire_adjunct_files/4/231358-res-5-at.pdf)

## Appendix 5: Calculation of observations windows

### Scenario 1: No Relapse/SMN

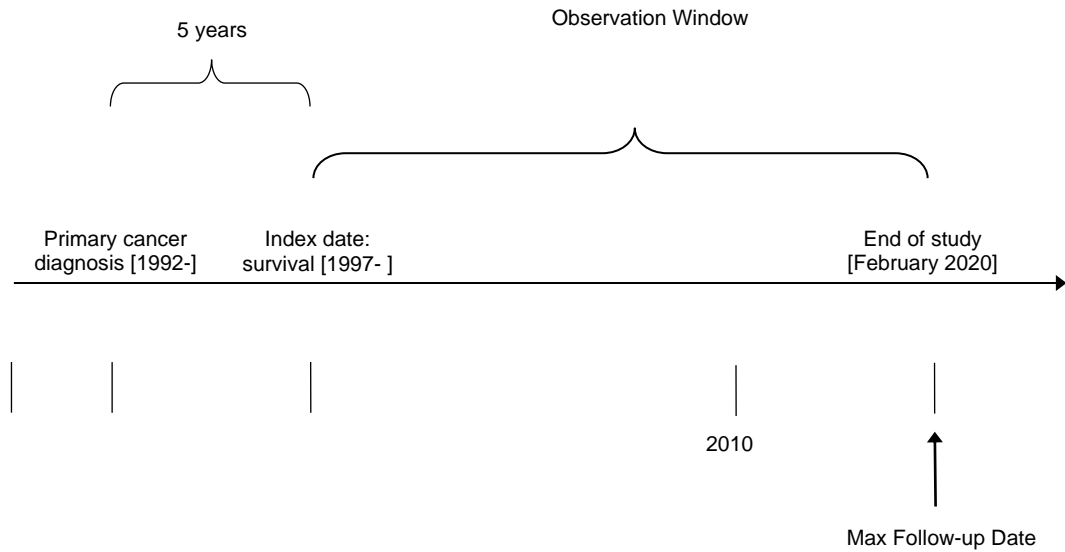

### Scenario 2: Relapse/SMN in <5 years from initial diagnosis

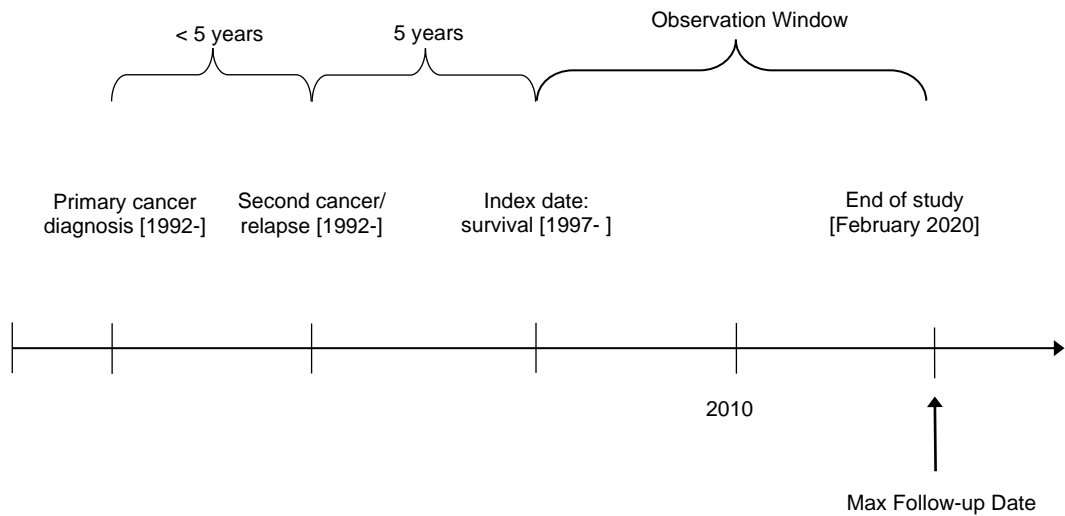

### Scenario 3: Relapse/SMN in $\geq 5$ years from initial diagnosis

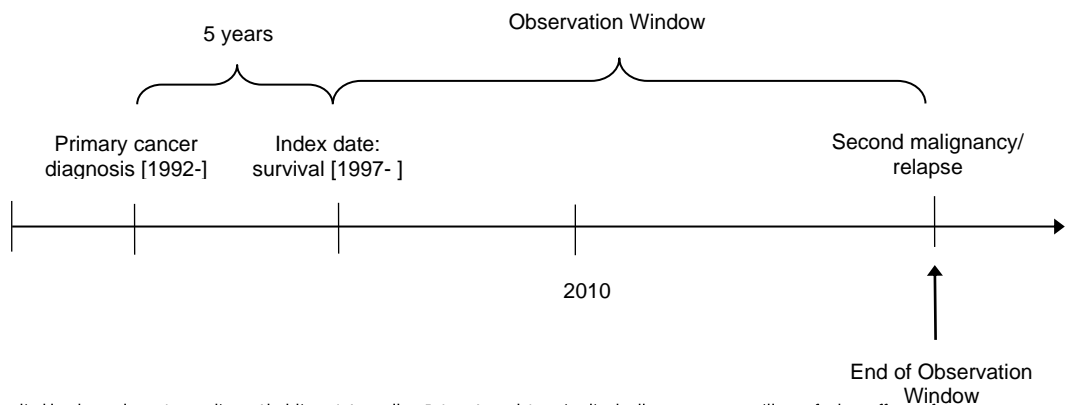

Supplement: 231358-res-5-at.pdf [file 231358-res-5-at.pdf]
